# Supplementary material
Source: PubMed Central journal article supplement (PMC3731565)
Supplement: cr201385x1.pdf [file cr201385x1.pdf]

Supplementary information, Table S1: In vitro development of embryos injected with mRNA.

| <b>Target genes</b> | <b>mRNA concentration (ng/ul)</b> | <b>NO. Cultured</b> | <b>NO. Cleaved</b> | <b>NO. Blastocysts (%)</b> | <b>No. Screened</b> | <b>NO. Modified (%)</b> | <b>NO. Double KO (%)</b> |
|---------------------|-----------------------------------|---------------------|--------------------|----------------------------|---------------------|-------------------------|--------------------------|
| <b>RAG1</b>         | <b>50ng/ul</b>                    | <b>41</b>           | <b>37</b>          | <b>27 ( 73% )</b>          | <b>25</b>           | <b>23(92%)</b>          | <b>0</b>                 |
| <b>RAG2</b>         | <b>50ng/ul</b>                    | <b>28</b>           | <b>25</b>          | <b>9 ( 36% )</b>           | <b>16</b>           | <b>12(75%)</b>          | <b>3 ( 19% )</b>         |
