# Supplementary material
Source: PubMed Central journal article supplement (PMC3731565)
Supplement: cr201385x2.pdf [file cr201385x2.pdf]

Supplementary information, Figure S1

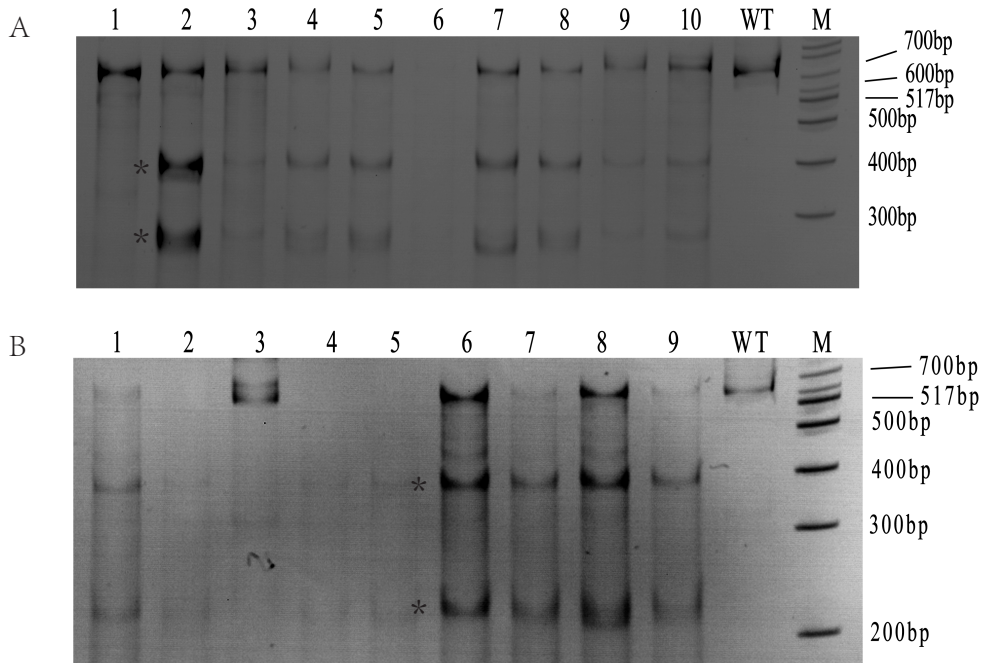

Figure S1 TALEN modification of RAG1 (A) and RAG2 (B) gene in in-vitro cultured rabbit blastocysts with T7 endonuclease I assay. The expected lengths of the T7E1 digestion products are indicated as “\*”.
