# Supplementary material
Source: PubMed Central journal article supplement (PMC3731565)
Supplement: cr201385x3.pdf [file cr201385x3.pdf]

Supplementary information, Figure S2

RAG1 TALEN

|    |                                                           |            |
|----|-----------------------------------------------------------|------------|
| WT | <u>CCACCAAGCCAAACCTTTCGACATCTTTGCCGCATCTGTGGGAATTCTTT</u> |            |
| 1  | CCACCAAGCCAAACCTTTCGACATCTTTGCCGCATCTGTGGGAATTCTTT        | WT         |
|    | CCACCAAGCCAAACCTTTCGACATCTTTGCCGCATCTGTGGGAATTCTTT        | (Δ1) x6    |
| 2  | CCACCAAGCCAAACCTTTCGACATCTTTGCCGCATCTGTGGGAATTCTTT        | WT         |
|    | CCACCAAGCCAAACCTTTCGACAT--TGCCGCATCTGTGGGAATTCTTT         | (Δ3) x2    |
|    | CCACCAAGCCAAACCTTTCGACA A-----CCGCATCTGTGGGAATTCTTT       | (Δ6,+1) x2 |
|    | CCACCAAGCCAAACCTTTCGACA-----CCGCATCTGTGGGAATTCTTT         | (Δ6) x4    |
| 3  | CCACCAAGCCAAACCTTTCGACATCTTTGCCGCATCTGTGGGAATTCTTT        | WT         |
|    | CCACCAAGCCAAACCTTTCGACATCTTTT TTTTGCCGCATCTGTGGGAATT      | (+4) x2    |
|    | CCACCAAGCCAAACCTTTCGACATC-----TGTTGGGAATTCTTT             | (Δ11) x3   |
| 4  | CCACCAAGCCAAACCTTTCGACATCTTTGCCGCATCTGTGGGAATTCTTT        | WT         |
|    | CCACCAAGCCAAACCTTTCGACATCT-----GATGGGAATTCTTT             | (Δ12,+2)   |
|    | CCACCAAGCCAAACCTTTCGACATCT-----GTGGGAATTCTTT              | (Δ11) x3   |
|    | CCACCAAGCCAAACCTTTCGACAT-----                             | (Δ88)      |
| 5  | CCACCAAGCCAAACCTTTCGACATCTTTGCCGCATCTGTGGGAATTCTTT        | WT         |
|    | CCACCAAGCCAAACCTTTCGACAT-----CTGTGGGAATTCTTT              | (Δ11) x3   |
| 6  | CCACCAAGCCAAACCTTTCGACATCT-----GTGGGAATTCTTT              | (Δ11)      |
|    | CCACCAAGCCAAACCTTTCGAC-----                               | (Δ34)      |
|    | CCACCAAGCCAAACCTTTCGAC-----                               | (Δ108) x5  |
| 8  | CCACCAAGCCAAACCTTTCGACATCTTTGCCGCATCTGTGGGAATTCTTT        | (Δ1) x4    |
|    | CCACCAAGCCAAACCTTTCGACAT---GCCGCATCTGTGGGAATTCTTT         | (Δ4) x4    |
| 9  | CCACCAAGCCAAACCTTTCGACATCTTTGCCGCATCTGTGGGAATTCTTT        | (Δ1) x5    |
|    | CCACCAAGCCAAACCTTTCGACATCT--GCCGCATCTGTGGGAATTCTTT        | (Δ2) x2    |
| 10 | CCACCAAGCCAAACCTTTCGACAT-----                             | (Δ88) x6   |
| 11 | CCACCAAGCCAAACCTTTCGACATCTGGGACATGCCGCATCTGTGGGAAT        | (Δ1,+6) x2 |
|    | CCACCAAGCCAAACCTTTCGACAT---TGCCGCATCTGTGGGAATTCTTT        | (Δ3) x3    |
|    | CCACCAAGCCAAACCTTTCGACAT-----CTGTGGGAATTCTTT              | (Δ11)      |
| 12 | CCACCAAGCCAAACCTTTCGACATCT-----GTGGGAATTCTTT              | (Δ11) x8   |
| 13 | CCACCAAGCCAAACCTTTCGACAT---TGCCGCATCTGTGGGAATTCTTT        | (Δ3) x7    |
|    | CCACCAAGCCAAACCT-----GCCGCATCTGTGGGAATTCTTT               | (Δ11)      |
| 14 | CCACCAAGCCAAACCTTTCGACATCTGTGGGTGCCGCATCTGTGGGAATTC       | (Δ2,+5)    |
|    | CCACCAAGCCAAACCTTTCGACAT---GCCGCATCTGTGGGAATTCTTT         | (Δ4) x3    |
|    | CCACCAAGCCAAACCTTTCGACAT-----CCGCATCTGTGGGAATTCTTT        | (Δ5)       |
|    | CCACCAAGCCAAACCTTTCGACA-----ATTCTTT                       | (Δ20) x3   |
| 15 | CCACCAAGCCAAACCTTTCGACATCTTTGCCGCATCTGTGGGAATTCTTT        | WT         |
|    | CCACCAAGCCAAACCTTTCGACAT---TGCCGCATCTGTGGGAATTCTTT        | (Δ3) x6    |
| 16 | CCACCAAGCCAAACCTTTCGACAT---GCCGCATCTGTGGGAATTCTTT         | (Δ4) x3    |
|    | CCACCAAGCCAAACCTTTCGA-----CATCTGTGGGAATTCTTT              | (Δ11) x2   |
|    | CCACCAAGCCAAACCTTTCG-----CATCTGTGGGAATTCTTT               | (Δ12)      |
| 17 | CCACCAAGCCAAACCTTTCG-----CATCTGTGGGAATTCTTT               | (Δ12)      |
|    | CCACCAAGCCAAACCTTTCGAC-----                               | (Δ88) x4   |
| 18 | CCACCAAGCCAAACCTTTCGACATCT-----GTGGGAATTCTTT              | (Δ11) x9   |

Figure S2 Sequencing analysis for TALENs-induced mutations in the RAG1 alleles in newborn rabbits. Multiple mutations were found in the target site including insertion, deletion or combination. The recognition regions of RAG1 exon are underlined. The red letters indicated insertions.
