# Supplementary material
Source: PubMed Central journal article supplement (PMC3731565)
Supplement: cr201385x4.pdf [file cr201385x4.pdf]

Supplementary information, Figure S3

| RAG2 TALEN |                                                                                                                                                                                          |
|------------|------------------------------------------------------------------------------------------------------------------------------------------------------------------------------------------|
| WT         | <u>CCGTTACCCAGCCACTTGCACATTCCAAGGCAGCTCAGAGTCTGAAAA</u>                                                                                                                                  |
| 1          | <u>CCGTTACCCAGCCACTTGACA</u> -----GGCAGCTCAGAGTCTGAAAAA (Δ6)<br><u>CCGTTACCCAGCCACTTG</u> -----CAGCTCAGAGTCTGAAAAA (Δ12) x3<br><u>CCGTTACCCAGC</u> A-----CAGCTCAGAGTCTGAAAAA (Δ19,+1) x2 |
| 2          | <u>CCGTTACCCAGCCACTTGACAT</u> ----AGGCAGCTCAGAGTCTGAAAAA (Δ4) x4<br><u>CCGTTACCCAGCC</u> TTG-----CAGCTCAGAGTCTGAAAAA (Δ17,+3) x3                                                         |
| 3          | <u>CCGTTACCCAGCCACTTGCA</u> G-----CTCAGAGTCTGAAAAA (Δ13,+1) x4<br><u>CCGTTACCCAGCCACTTGCA</u> -----CAGAGTCTGAAAAA (Δ15) x4                                                               |
| 4          | <u>CCGTTACCCAGCCACTTGACA</u> GTG-----GCTCAGAGTCTGAAAAA (Δ10,+3) x7                                                                                                                       |

Figure S3 Sequencing analysis for TALENs-induced mutations in the RAG2 alleles in newborn rabbits. Multiple mutations were found in the target site including insertion, deletion or combination. The recognition regions of RAG2 exon are underlined. The red letters indicated insertions.
