# Supplementary material
Source: PubMed Central journal article supplement (PMC3731565)
Supplement: cr201385x5.pdf [file cr201385x5.pdf]

Supplementary information, Table S2: Primer pairs used for sequence analysis

| Primer          | Sequence(5'-3')                |
|-----------------|--------------------------------|
| rRAG1-F1        | 5' CTTACTTGTTTCCCTTGTACCCAG 3' |
| rRAG1-F2        | 5' CCTCCCTTGAGCAATCTCCAG 3'    |
| rRAG1-R1        | 5' GGAGCACCGCTAAACTTCCTGT 3'   |
| rRAG1-R2        | 5' CCCCACGCGGCAGTGTA 3'        |
| rRAG2-F1        | 5' CTACACACAATCCGAAAACATGTC 3' |
| rRAG2-F2        | 5' ACAGCCTTAATCAACCAGGCT 3'    |
| rRAG2-R1        | 5' GCATGTATGACCGTCCTCCAAA 3'   |
| rRAG2-R2        | 5' TTCAAAATCCACCAAGAAAACATG 3' |
| rTCR $\beta$ -F | 5' CTGCTTTGTCTCTTTCCCCCATA 3'  |
| rTCR $\beta$ -R | 5' CAGGAAAACACAGGACCCTCAAG 3'  |
| rGAPDH-F        | 5' GGAGCCAAACGGGTCATCATCTC 3'  |
| rGAPDH-R        | 5' GAGGGGCCATCCACAGTCTTCT 3'   |
