# Supplementary material
Source: PubMed Central journal article supplement (PMC3731565)
Supplement: cr201385x6.pdf [file cr201385x6.pdf]

Supplementary information, Figure S4

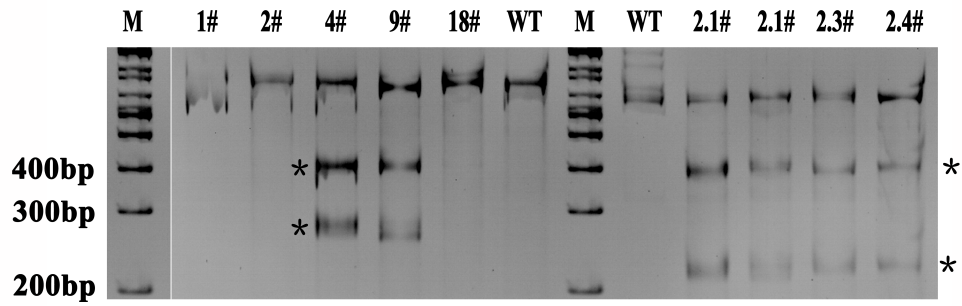

Figure S4 T7 endonuclease I (T7E1) assay was performed using peripheral blood genomic DNA from survival founder rabbit derived from mRNA injection. The expected lengths of the T7E1 digestion products are indicated as “\* ”.
