# Supplementary material
Source: PubMed Central journal article supplement (PMC3731565)
Supplement: cr201385x7.pdf [file cr201385x7.pdf]

Supplementary information, Table S3: Potential off-target sites of RAG1 TALENs predicted by e-PCR in the rabbit genome

| Rabbit-rag1-TALEN               |        |           |          |      |      |                 |
|---------------------------------|--------|-----------|----------|------|------|-----------------|
| seq                             | strand | from      | to       | mism | gaps | act_len/exp_len |
| gi 283557968 ref NW_003159226.1 | +      | 22779832  | 22780256 | 5    | 2    | 425/0-1000      |
| gi 283557968 ref NW_003159226.1 | -      | 19885750  | 19886797 | 6    | 2    | 1048/0-1000     |
| gi 283557967 ref NW_003159227.1 | -      | 16096807  | 16097323 | 6    | 2    | 517/0-1000      |
| gi 283557965 ref NW_003159229.1 | +      | 52618352  | 52618640 | 6    | 2    | 289/0-1000      |
| gi 283557964 ref NW_003159230.1 | +      | 18196441  | 18196488 | 0    | 0    | 48/0-1000       |
| gi 283557962 ref NW_003159232.1 | +      | 40761755  | 40762488 | 6    | 1    | 734/0-1000      |
| gi 283557962 ref NW_003159232.1 | -      | 30856184  | 30857212 | 6    | 2    | 1029/0-1000     |
| gi 283557959 ref NW_003159235.1 | +      | 9966050   | 9966680  | 5    | 1    | 631/0-1000      |
| gi 283557955 ref NW_003159239.1 | -      | 4107957   | 4108758  | 5    | 0    | 802/0-1000      |
| gi 283557943 ref NW_003159251.1 | +      | 15121948  | 15122170 | 6    | 1    | 223/0-1000      |
| gi 283557943 ref NW_003159251.1 | +      | 15097686  | 15097909 | 6    | 1    | 224/0-1000      |
| gi 283557943 ref NW_003159251.1 | -      | 15069608  | 15069830 | 6    | 1    | 223/0-1000      |
| gi 283557943 ref NW_003159251.1 | -      | 15057223  | 15058003 | 6    | 1    | 781/0-1000      |
| gi 283557942 ref NW_003159252.1 | -      | 70363     | 70586    | 6    | 1    | 224/0-1000      |
| gi 283557940 ref NW_003159254.1 | -      | 7963067   | 7964015  | 6    | 1    | 949/0-1000      |
| gi 283557938 ref NW_003159256.1 | -      | 139938    | 140231   | 6    | 2    | 294/0-1000      |
| gi 283557932 ref NW_003159262.1 | -      | 3010379   | 3011202  | 5    | 1    | 824/0-1000      |
| gi 283557931 ref NW_003159263.1 | +      | 13600188  | 13600268 | 6    | 2    | 81/0-1000       |
| gi 283557908 ref NW_003159286.1 | -      | 7872793   | 7872829  | 6    | 1    | 37/0-1000       |
| gi 283557899 ref NW_003159295.1 | +      | 1627097   | 1627556  | 6    | 0    | 460/0-1000      |
| gi 283557898 ref NW_003159296.1 | -      | 118323021 | 1833319  | 6    | 2    | 1018/0-1000     |
| gi 283557897 ref NW_003159297.1 | -      | 1042631   | 1043351  | 6    | 2    | 721/0-1000      |
| gi 283557895 ref NW_003159299.1 | -      | 45978182  | 45979003 | 6    | 0    | 822/0-1000      |
| gi 283557894 ref NW_003159300.1 | -      | 4302717   | 4303142  | 6    | 1    | 426/0-1000      |
| gi 283557892 ref NW_003159302.1 | +      | 6728287   | 6728409  | 6    | 1    | 123/0-1000      |
| gi 283557879 ref NW_003159315.1 | -      | 4476525   | 4476635  | 5    | 2    | 111/0-1000      |

For RAG1 TALENs, 26 potential off-target sites were identified. Among these, two sites highlighted in yellow that had a spacer of <100 bp between two binding sequences were amplified and sequenced. No mutations were found at these sites. The hits in red are the RAG1 target site used in this study. The list of primers can be found in Supplementary Table 4.
