# Supplementary material
Source: PubMed Central journal article supplement (PMC3731565)
Supplement: cr201385x8.pdf [file cr201385x8.pdf]

Supplementary information, Table S4: Potential off-target sites of RAG2 TALENs predicted by

e-PCR in the rabbit genome

| Rabbit-rag2-TALEN               |        |          |          |      |      |                 |
|---------------------------------|--------|----------|----------|------|------|-----------------|
| seq                             | strand | from     | to       | mism | gaps | act_len/exp_len |
| gi 283557965 ref NW_003159229.1 | +      | 39999452 | 39999542 | 6    | 1    | 91/0-1000       |
| gi 283557964 ref NW_003159230.1 | -      | 18210028 | 18210075 | 0    | 0    | 48/0-1000       |
| gi 283557955 ref NW_003159239.1 | +      | 14563817 | 14564784 | 6    | 1    | 968/0-1000      |
| gi 283557950 ref NW_003159244.1 | -      | 3077539  | 3077589  | 6    | 1    | 51/0-1000       |
| gi 283557949 ref NW_003159245.1 | +      | 29173718 | 29174639 | 6    | 1    | 922/0-1000      |
| gi 283557930 ref NW_003159264.1 | +      | 5793431  | 5794280  | 5    | 1    | 850/0-1000      |
| gi 283557928 ref NW_003159266.1 | -      | 4274571  | 4274800  | 6    | 1    | 230/0-1000      |
| gi 283557923 ref NW_003159271.1 | -      | 8874357  | 8874611  | 6    | 1    | 255/0-1000      |
| gi 283557922 ref NW_003159272.1 | -      | 660983   | 661075   | 6    | 1    | 93/0-1000       |
| gi 283557917 ref NW_003159277.1 | +      | 31316821 | 31316909 | 6    | 1    | 89/0-1000       |
| gi 283557908 ref NW_003159286.1 | +      | 28521846 | 28522222 | 6    | 1    | 377/0-1000      |
| gi 283557908 ref NW_003159286.1 | -      | 67416112 | 67416888 | 6    | 1    | 777/0-1000      |
| gi 283557892 ref NW_003159302.1 | -      | 35934464 | 35934513 | 6    | 2    | 50/0-1000       |
| gi 283557879 ref NW_003159315.1 | -      | 20389574 | 20389643 | 6    | 2    | 70/0-1000       |

For RAG2 TALENs, 14 potential off-target sites were identified. Six sites highlighted in yellow were amplified and sequenced. No mutations were found at these sites. The hits in red are the RAG2 target site used in this study. The list of primers can be found in Supplementary Table 4.
