# Supplementary material
Source: PubMed Central journal article supplement (PMC3731565)
Supplement: cr201385x9.pdf [file cr201385x9.pdf]

Supplementary information, Table S5: Primers used for identification of potential off-target sites

| Primer               | Sequence (5'-3')                |
|----------------------|---------------------------------|
| R-RAG1-off target F1 | 5' AAAAGAAGGACTGCTCCGACTC 3'    |
| R-RAG1-off target R1 | 5' GCAAAGAGCTTAGGCTCCTTTTAG 3'  |
| R-RAG1-off target F2 | 5' ACAGGTGCTGACATTTAGAAGTTG 3'  |
| R-RAG1-off target R2 | 5' ATCACTTTATATCATACCACCCAGG 3' |
| R-RAG2-off target F1 | 5' ACAGGAAGTATGCCTTGATCCAC 3'   |
| R-RAG2-off target R1 | 5' CCTGTTGTTACTAAAGCACAGCC 3'   |
| R-RAG2-off target F2 | 5' AGCCTCTACCTGCTGCACTAGC 3'    |
| R-RAG2-off target R2 | 5' ACACATACACATGTTACGGATTGTC 3' |
| R-RAG2-off target F3 | 5' GTGAAAAGTCTAGCTTCCTACCGAC 3' |
| R-RAG2-off target R3 | 5' GTTGGCTGGAGACTGGCCTG 3'      |
| R-RAG2-off target F4 | 5' TAGTCAATGATATTGGTGGTCAATC 3' |
| R-RAG2-off target R4 | 5' CCTGGGATATAAATAGGAACAAGC 3'  |
| R-RAG2-off target F5 | 5' TATCATCTTCTTTGTCCTAAGCACC 3' |
| R-RAG2-off target R5 | 5' TATTGCAAATCTTACCCATTGCTT 3'  |
| R-RAG2-off target F6 | 5' CAAATCAAGAGGACATTCCACACTA 3' |
| R-RAG2-off target R6 | 5' ACGTATGAGGCACCAGGTGTTG 3'    |
